# Supplementary material
Source: Research Square preprint supplement (doi:10.21203/rs.3.rs-9383471/v1)
Supplement: Supplementary file 1 [file 5c6f9ba9da86afe06753bb43.docx]

Supplementary material

**Appendix 1: Interview and Focus Group Discussion Guide**

Section A: Background Information

- Can you briefly describe your role in health promotion or community health education?
  - Age range
  - Sex (Gender)
  - Highest educational qualification
  - Designation
  - Years of experience in health education/health promotion

Section B: Experiences with Health Misinformation

- What kinds of health rumours or misinformation do you commonly hear in the communities where you work?
- Can you describe situations where misinformation affected community health behaviour?

Section C: Sources of Misinformation

- Where do community members usually obtain the misinformation they share?
- Are there particular sources that are more influential?

Section D: Response Strategies

- How do you usually respond when community members raise misinformation during health education sessions?

Section E: Challenges

- What challenges do you face when trying to correct misinformation?

Section F: Training and Capacity Needs

- What additional support or training would help you address misinformation more effectively?
